# Supplementary material for: The Role of Nonlinear Body Force in Electrostatic Propeller Driven by Atmospheric DC Corona Discharges
Source: Research Square preprint supplement (doi:10.21203/rs.3.rs-1122828/v1), 2021-12-14
Supplement: Supplementary file 1 [file c44cbffff2b949d93678e2c9.docx]

**The role of nonlinear body force in electrostatic propeller driven by atmospheric DC corona discharges**

**Supplementary Material**

**F. Sohbatzadeh*, H. Soltani Ahmadi, H. Mirzanejhad**

S1: Sequence change in the smoke movement that initiated at a voltage of 6 kV from the position of the first incense. The maximum applied voltage was +18 kV.

S2: The effect of applied positive voltage up to +18 kV-DC on the electric wind production,

S3: The effect of applied negative voltage up to -18 kV-DC on the electric wind production
